# Supplementary material
Source: PubMed Central journal article supplement (PMC4054448)
Supplement: JVI.00256-14_zjv999099222so1.pdf [file JVI.00256-14_zjv999099222so1.pdf]

1 **Structural Analysis of Respiratory Syncytial Virus Reveals the Position of M2-1 Between**  
2 **the Matrix Protein and the Ribonucleoprotein Complex**

3

4 Gabriella Kiss<sup>1\*</sup>, Jens M. Holl<sup>1\*</sup>, Grant M. Williams<sup>1</sup>, Eric Alonas<sup>2</sup>, Daryll Vanover<sup>2</sup>, Aaron W.  
5 Lifland<sup>3</sup>, Manasa Gudheti<sup>3</sup>, Ricardo C. Guerrero-Ferreira<sup>1</sup>, Vinod Nair<sup>4</sup>, Hong Yi<sup>5</sup>, Barney S.  
6 Graham<sup>6</sup>, Philip J. Santangelo<sup>2</sup>, Elizabeth R. Wright<sup>1,5,#</sup>

7

8 **Affiliations:**

9 <sup>1</sup>Division of Pediatric Infectious Diseases. Department of Pediatrics. Emory University School  
10 of Medicine. Children's Healthcare of Atlanta. Atlanta, GA 30322.

11 <sup>2</sup>Wallace H. Coulter Department of Biomedical Engineering. Georgia Institute of Technology  
12 and Emory University. Atlanta, GA, 30332.

13 <sup>3</sup>Vutara, Inc. Salt Lake City, UT 84108.

14 <sup>4</sup>Research Technologies Branch, Microscopy Unit, Rocky Mountain Laboratories, National  
15 Institute of Allergy and Infectious Diseases, NIH, Hamilton, MT 59840.

16 <sup>5</sup>Robert P. Apkarian Integrated Electron Microscopy Core. Emory University. Atlanta, GA  
17 30322.

18 <sup>6</sup>Vaccine Research Center, National Institute of Allergy and Infectious Diseases, National  
19 Institutes of Health, Bethesda, MD 20892.

20 \*These authors contributed equally to this work.

21

22 #To whom correspondence should be addressed. E-mail: erwright@emory.edu; Tel. (+1) 404  
23 727 4665; Fax (+1) 404 727 9223.

24

25

26 **Supplementary Materials**

27

28 **Supplementary Movie 1. Cryo-electron tomography of filamentous RSV.** This movie is of  
29 a z-slice progression through a tomographic reconstruction, the segmentation, and the direct  
30 volume rendering of a filamentous RSV viral particle. The viral membrane is presented in  
31 green. The matrix protein is depicted in yellow. The M2-1 densities are highlighted in red.  
32 White tubular densities correspond to the RNP.

33

34 **Supplementary Movie 2. Zernike phase contrast cryo-electron tomography of**  
35 **asymmetric RSV.**

36 This movie is of a z-slice progression through a tomographic reconstruction and the  
37 segmentation of an asymmetric RSV viral particle. The viral membrane is presented in green.  
38 The matrix protein is depicted in yellow. The M2-1 densities are highlighted in red. White  
39 tubular densities correspond to the RNP.

40
